# Supplementary material for: Exploring COVID-19 circuit breaker (CB) restrictions at a migrant worker dormitory in Singapore: a case study and nested mixed-method analysis of stress management and mental health
Source: HighWire-hosted journal article supplement (doi:10.1136/bmjopen-2021-060163), 2022-08-01
Supplement: bmjopen-2021-060163supp001_data_supplement.pdf [file bmjopen-2021-060163supp001_data_supplement.pdf]

## SUPPLEMENTARY FILE

Supplementary Table 1: Description of Survey and interview participants

|                                          |                                                                             | <b>Sociodemographic information</b> |                        |
|------------------------------------------|-----------------------------------------------------------------------------|-------------------------------------|------------------------|
| Variables                                | Categories                                                                  | Survey                              |                        |
|                                          |                                                                             | Participants<br>(N=175)             | Interviewees<br>(N=23) |
| <i>Age</i>                               | 21 to 29 years old                                                          | 88                                  | 8                      |
|                                          | 30 to 37 years old                                                          | 63                                  | 11                     |
|                                          | 38 to 47 years old                                                          | 24                                  | 4                      |
| <i>Nationality</i>                       | Bangladeshi                                                                 | 69                                  | 12                     |
|                                          | Indian                                                                      | 106                                 | 11                     |
| <i>Income range</i>                      | Less than \$500 per month                                                   | 58                                  | 4                      |
|                                          | \$500 to \$749 per month                                                    | 61                                  | 10                     |
|                                          | More than \$750 per month                                                   | 56                                  | 9                      |
| <i>Marital Status</i>                    | Single                                                                      | 77                                  | 7                      |
|                                          | Married/ divorced                                                           | 98                                  | 16                     |
| <i>Highest education level</i>           | Formal education up to high school only                                     | 92                                  | 15                     |
|                                          | Tertiary education (vocational/ polytechnic/ pre-university, undergraduate) | 83                                  | 8                      |
| <i>Time spent away from home country</i> | Less than 2 years                                                           | 34                                  | 3                      |
|                                          | More than 2 years                                                           | 141                                 | 20                     |

Supplementary Figure 1: Sampling grid for selection by variation in age and nationality, n=23, with characteristics reported in aggregate\*

| Sampling by age                            | Pseudonym       | Marital status                  | Income-range                                     |
|--------------------------------------------|-----------------|---------------------------------|--------------------------------------------------|
| <b>Bangladeshi</b>                         | Zafar           | <i>2x single<br/>2x married</i> | <i>Average income is under s\$549 per month</i>  |
|                                            | Rana            |                                 |                                                  |
|                                            | Habib           |                                 |                                                  |
|                                            | Rony            |                                 |                                                  |
| <b>Indian</b>                              | Pandian         | <i>All single</i>               | <i>Average income is under s\$874 per month</i>  |
|                                            | Murugan         |                                 |                                                  |
|                                            | Ganesh          |                                 |                                                  |
|                                            | Natrajan        |                                 |                                                  |
| <i>Younger: 21-29 years of age</i>         |                 |                                 |                                                  |
| <b>Bangladeshi</b>                         | Amitava         | <i>1x single<br/>3x married</i> | <i>Average income is under s\$749 per month</i>  |
|                                            | Shurid          |                                 |                                                  |
|                                            | Manik           |                                 |                                                  |
|                                            | Sakib           |                                 |                                                  |
| <b>Indian</b>                              | Aravind         | <i>All married</i>              | <i>Average income is under s\$999 per month</i>  |
|                                            | Mahesh          |                                 |                                                  |
|                                            | NA <sup>†</sup> |                                 |                                                  |
|                                            | NA              |                                 |                                                  |
| <i>Middle age-band: 30-35 years of age</i> |                 |                                 |                                                  |
| <b>Bangladeshi</b>                         | Kamal           | <i>All married</i>              | <i>Average income is under s\$949 per month</i>  |
|                                            | Ijaz            |                                 |                                                  |
|                                            | Omi             |                                 |                                                  |
|                                            | Hashem          |                                 |                                                  |
| <b>Indian</b>                              | Mani            | <i>All married</i>              | <i>Average income is under s\$1149 per month</i> |
|                                            | Rachandranan    |                                 |                                                  |
|                                            | Ramesh          |                                 |                                                  |
|                                            | Raghu           |                                 |                                                  |
| <i>Older: 36 years of age or more</i>      | Vishnu          |                                 |                                                  |

\*Note: We have assigned pseudonyms which will be the main reporting criteria tagged to quote to ensure we preserve anonymity while accurately reporting findings;

<sup>†</sup>NA refers to not applicable as unable to recruit.
